# Supplementary material
Source: PubMed Central journal article supplement (PMC7831157)
Supplement: NIHMS1656747-supplement-Supplemental_appendix.pdf [file NIHMS1656747-supplement-Supplemental_appendix.pdf]

Appendix 1: Genes included into the 50-gene cancer panel

|      |        |       |       |      |        |        |         |
|------|--------|-------|-------|------|--------|--------|---------|
| ABL1 | CDH1   | ERBB4 | FLT3  | IDH1 | KRAS   | NRAS   | RET     |
| AKT1 | CDKN2A | EZH2  | GNA11 | JAK2 | MET    | PDGFRA | SMAD4   |
| ALK  | CSF1R  | FBXW7 | GNAS  | JAK3 | MLH1   | PIK3CA | SMARCB1 |
| APC  | CTNNB1 | FGFR1 | GNAQ  | IDH2 | MPL    | PTEN   | SMO     |
| ATM  | EGFR   | FGFR2 | HNF1A | KDR  | NOTCH1 | PTPN11 | SRC     |
| BRAF | ERBB2  | FGFR3 | HRAS  | KIT  | NPM1   | STK11  | TP53    |
| VHL  |        |       |       |      |        |        |         |
